# Supplementary material for: Swimmer’s itch in Canada: a look at the past and a survey of the present to plan for the future
Source: PubMed Central journal article supplement (PMC6203143; doi:10.1186/s12940-018-0417-7), 2018-10-25
Supplement: 12940_2018_417_MOESM1_ESM.pdf [file 12940_2018_417_MOESM1_ESM.pdf]

| Province                | Schistosome spp.                                                                                           | Intermediate Hosts                                                                                         | Definitive Hosts                                                                            | Location/Outbreaks/Cases                                                                                                         | Reference(s)                                                                                 |
|-------------------------|------------------------------------------------------------------------------------------------------------|------------------------------------------------------------------------------------------------------------|---------------------------------------------------------------------------------------------|----------------------------------------------------------------------------------------------------------------------------------|----------------------------------------------------------------------------------------------|
| <u>Alberta</u>          |                                                                                                            |                                                                                                            |                                                                                             | Authentic records of dermatitis at Peace River district <sup>§</sup>                                                             | Cort, W.W. (1936) Am. J. Hyg. 24(2):318-333                                                  |
|                         | <i>Cercaria elvae</i> <sup>†</sup>                                                                         | <i>Lymnaea stagnalis</i>                                                                                   |                                                                                             | Summer 1939: Outbreaks in Lakes at Elk Island Park                                                                               | Hadwen, S. & Fallis, A.M. (1940) Can. Pub. Health Assoc. 31(1):30                            |
|                         | <i>Dendrobilharzia pulverulenta</i>                                                                        |                                                                                                            | Eared Grebe ( <i>Podiceps nigricollis</i> )                                                 |                                                                                                                                  | Vande Vusse, F.J. (1980) J. Parasitol. 66(5):814-822                                         |
|                         | <i>Trichobilharzia stagnicolae</i><br><i>Trichobilharzia szidati</i>                                       | <i>Stagnicola elodes</i><br><i>Lymnaea stagnalis</i>                                                       |                                                                                             | Summer 2013-2014: Isle Lake<br>Summer 2013-2014: Gull Lake and Buffalo Lake (The Narrows)                                        | This study                                                                                   |
|                         | <i>Trichobilharzia physellae</i><br><i>Avian Schistosomatid sp. A</i>                                      | <i>Physella gyrina</i><br><i>Physella gyrina</i>                                                           |                                                                                             | August 2013: Lac la Nonne<br>Summer 2015: Isle Lake and Buffalo Lake                                                             |                                                                                              |
|                         | <i>Avian Schistosomatid sp. B</i><br><i>Avian Schistosomatid sp. C</i><br><i>Schistosomatium douthitti</i> | <i>Physella gyrina</i><br><i>Helisoma trivolvis</i><br><i>Lymnaea stagnalis</i> & <i>Stagnicola elodes</i> |                                                                                             | August 2013: Lac la Nonne<br>July 2015: Wabamun Lake<br>Summer 2013-2015: Gull Lake, Wabamun Lake, Buffalo Lake (The Narrows)    |                                                                                              |
| <u>British Columbia</u> | <i>Cercaria elvae</i> <sup>†</sup>                                                                         | <i>Lymnaea stagnalis wasatchensis</i>                                                                      |                                                                                             | Paul Lake                                                                                                                        | Cort, W.W. (1936) Am. J. Hyg. 24(2):318-333                                                  |
|                         | <i>Trichobilharzia adamsi</i>                                                                              | <i>Physa cf. conformis</i>                                                                                 | Peking ducklings*                                                                           | Summer 1950: Severe outbreak at Cultus Lake                                                                                      | Edwards & Jansch (1955) Can. J. Zool. 33:182-194                                             |
|                         | <i>Cercaria columbiensis</i>                                                                               | <i>Physa cf. conformis</i>                                                                                 |                                                                                             |                                                                                                                                  |                                                                                              |
|                         | <i>Cercaria stagnicolae</i> <sup>‡</sup>                                                                   | <i>Lymnaea emarginata angulata</i>                                                                         |                                                                                             | Summer 1963: Two outbreaks at Cultus Lake                                                                                        | Howard, T.E. & Walden, C.C. (1965) J. Appl. Ecol. 2(1):121-135                               |
|                         | <i>Cercaria physellae</i> <sup>†</sup>                                                                     | <i>Physa</i> spp. ( <i>P. ampullacea</i> , <i>P. conformis</i> , <i>P. occidentalis</i> )                  |                                                                                             |                                                                                                                                  |                                                                                              |
|                         | <i>Trichobilharzia stagnicolae</i>                                                                         | <i>Stagnicola catascopium</i>                                                                              | Common Merganser ( <i>Mergus merganser</i> )                                                | Cultus Lake                                                                                                                      | Leighton, B.J., et al. (2000) Parasitol. Int. 49(1):9-17                                     |
|                         | <i>Trichobilharzia physellae</i>                                                                           | <i>Physa</i> sp.                                                                                           | Common Merganser ( <i>Mergus merganser</i> )                                                | Cultus Lake                                                                                                                      |                                                                                              |
|                         | <i>Gigantobilharzia</i> sp.                                                                                | <i>Gyraulus parvus</i>                                                                                     | Unidentified Blackbird                                                                      | Cultus Lake                                                                                                                      |                                                                                              |
|                         | <i>Austrobilharzia variglandis</i>                                                                         | <i>Ilyanassa obsoleta</i>                                                                                  |                                                                                             | Summer 2001: 36 cases; Summer 2002: 44 cases at Crescent Beach                                                                   | Leighton, B.J. et al. (2004) Env. Health Rev. 48:5-13                                        |
| <u>Saskatchewan</u>     | <i>Cercaria elvae</i> <sup>†</sup>                                                                         | <i>Lymnaea stagnalis jugularis</i> , <i>L. pallustris nuttaliana</i> , & <i>Physa</i> sp.                  |                                                                                             | Found widely across the province <sup>§</sup>                                                                                    | Cort, W.W. (1936) Am. J. Hyg. 24(2):318-333                                                  |
| <u>Manitoba</u>         | <i>Cercaria elvae</i> <sup>†</sup><br><i>Cercaria</i> sp.                                                  | <i>Lymanea stagnalis jugularis</i><br><i>Stagnicola emarginata canadensis</i>                              |                                                                                             | Clear Lake                                                                                                                       | Swales, W. (1936) Can. J. Res. 14d(1):6-10                                                   |
|                         | <i>Cercaria wardlei</i>                                                                                    | <i>Limnaea obrussa</i> & <i>Stagnicola emarginata canadensis</i>                                           |                                                                                             | Summer 1933: Over 55,000 visitors to this lake, of which over 50% contracted swimmer's itch at Clear Lake                        | McLeod, J.A. (1934) Can. J. Res. 10(4):394-403; McLeod, J.A. (1940) Can. J. Res. 18d(1):1-28 |
|                         | <i>Cercaria stagnicolae</i> <sup>‡</sup>                                                                   | <i>Stagnicola emarginata canadensis</i>                                                                    |                                                                                             |                                                                                                                                  | McLeod, J.A. (1940) Can. J. Res. 18d(1):1-28                                                 |
|                         | <i>Cercaria dermolestes</i> sp. nov.<br><i>Ornitobilharzia aviani</i> sp. nov.                             | <i>Stagnicola palustris elodes</i>                                                                         | Ring-billed Gulls ( <i>Larus delawarensis</i> ) & Herring Gulls ( <i>Larus argentatus</i> ) | Southern Manitoba<br>Clear Lake, Lake Winnipeg, Lake Winnipegosis                                                                |                                                                                              |
|                         | <i>Ornitobilharzia filamenta</i> sp. nov.                                                                  |                                                                                                            | Ring-billed Gulls ( <i>Larus delawarensis</i> ) & Herring Gulls ( <i>Larus argentatus</i> ) |                                                                                                                                  |                                                                                              |
|                         | <i>Pseudobilharzia querquedulae</i> <sup>†</sup>                                                           |                                                                                                            | Blue-winged Teal ( <i>Anas discors</i> )                                                    |                                                                                                                                  |                                                                                              |
|                         | <i>Microbilharzia mantobensis</i> <sup>†</sup>                                                             |                                                                                                            | Canvas back duck ( <i>Aythya valisineria</i> )                                              | Lake Frances                                                                                                                     |                                                                                              |
|                         | <i>Microbilharzia canadensis</i> <sup>†</sup>                                                              |                                                                                                            | Canvas back duck ( <i>Aythya valisineria</i> )                                              |                                                                                                                                  |                                                                                              |
|                         | <i>Microbilharzia lari</i>                                                                                 |                                                                                                            | Ring-billed Gulls ( <i>Larus delawarensis</i> ) & Herring Gulls ( <i>Larus argentatus</i> ) | Lake Winnipeg & Clear Lake                                                                                                       |                                                                                              |
|                         | <i>Cercaria elvae</i> <sup>†</sup>                                                                         | <i>Lymnaea stagnalis</i>                                                                                   |                                                                                             | Summer 1961: Severe outbreaks at several uncontrolled lakes; Schistosomes found in Lake Norris, Lake Winnipeg, and Lake Manitoba | Farley, J. (1962) Can. J. Zool. 40:131-133                                                   |
|                         | <i>Schistosomatium douthitti</i>                                                                           | <i>Lymnaea stagnalis</i>                                                                                   | Muskrat ( <i>Microtus pennsylvanicus</i> )                                                  | Southern Manitoba                                                                                                                |                                                                                              |
|                         | <i>Gigantobilharzia lawayi</i>                                                                             |                                                                                                            | Ring-billed Gulls ( <i>Larus delawarensis</i> ) & Herring Gulls ( <i>Larus argentatus</i> ) | Twin beaches at Lake Manitoba, Grand beach at Lake Winnipeg, Red River at St. Andrews, and Moose Lake                            | Farley, J. (1964) Thesis: University of Manitoba                                             |

|                                          |                                          |                                                                    |                                                                                                                                                                                                                     |                                                                                                                                                          |                                                                                                                                       |
|------------------------------------------|------------------------------------------|--------------------------------------------------------------------|---------------------------------------------------------------------------------------------------------------------------------------------------------------------------------------------------------------------|----------------------------------------------------------------------------------------------------------------------------------------------------------|---------------------------------------------------------------------------------------------------------------------------------------|
|                                          | <i>Gigantobilharzia gyrauli</i>          | <i>Physa gyrina</i>                                                | Red-winged Blackbird ( <i>Agelaius phoeniceus</i> ), Yellow-headed Blackbird ( <i>Xanthocephalus xanthocephalus</i> ), Brown-headed Cowbird ( <i>Molothrus ater</i> ), Common Grackle ( <i>Quiscalus quiscula</i> ) | Long Lake, Meadows, St. Andrews, Norris Lake, North Shoal Lake, Twin beaches at Lake Manitoba                                                            |                                                                                                                                       |
|                                          | <i>Gigantobilharzia totani</i>           |                                                                    | Greater Yellow-legs ( <i>Totanus melanoleucus</i> ), Lesser Yellow-legs ( <i>T. flavipes</i> )                                                                                                                      | Lake Manitoba, Shoal Lake, Meadows, Moose Lake                                                                                                           |                                                                                                                                       |
|                                          | <i>Trichobilharzia querquedulae</i>      |                                                                    | Blue-winged Teal ( <i>Anas discors</i> ), Shoveller ( <i>Spatula clypeata</i> )                                                                                                                                     | Southern Manitoba                                                                                                                                        |                                                                                                                                       |
|                                          | <i>Austrotilharzia lari</i>              |                                                                    | Bonaparte's Gull ( <i>Larus philadelphia</i> )                                                                                                                                                                      | Southern Manitoba                                                                                                                                        |                                                                                                                                       |
|                                          | <i>Ornithobilharzia canaliculata</i>     |                                                                    | Bonaparte's Gull ( <i>Larus philadelphia</i> )                                                                                                                                                                      | Southern Manitoba                                                                                                                                        | Summer 1977: 6 cases investigated from Clearwater Lake and St. Malo, with additional outbreak reports from Gull Lake and Hecla Island |
|                                          | <i>Trichobilharzia brantae</i>           | <i>Gyraulus parvus</i>                                             | Snow Goose ( <i>Chen caerulescens</i> )                                                                                                                                                                             | Churchill                                                                                                                                                | Brant, S.V. & Loker, E.S. (2009) J. Parasitol. 95(4):941-963                                                                          |
|                                          | <i>Trichobilharzia sp. D</i>             | <i>Stagnicola sp.</i>                                              |                                                                                                                                                                                                                     |                                                                                                                                                          |                                                                                                                                       |
|                                          | <i>Trichobilharzia sp. E</i>             | <i>Stagnicola sp.</i>                                              | Northern Pintail ( <i>Anas acuta</i> )                                                                                                                                                                              |                                                                                                                                                          |                                                                                                                                       |
| <u>Ontario</u>                           |                                          |                                                                    |                                                                                                                                                                                                                     | Summer 1954: 53 cases at Lake Nipissing                                                                                                                  | Mitchell, J.C. (1954) A.M.A. Archives of Dermatology and Syphilology 70(6):805-808                                                    |
|                                          | <i>Schistosomatium douthitti</i>         | <i>Lymnaea stagnalis apressa</i> & <i>Lymnaea palustris elodes</i> |                                                                                                                                                                                                                     | Chaffey's Locks, Crosby, Cameron Lake, Glen Arm, Reaboro, Newcastle, Rondeau Park, Peterboro, Black Lake                                                 | Bourns, T.K.R. (1961) Can. J. Zool. 39(1):43-46                                                                                       |
| <u>Quebec</u>                            | <i>Trichobilharzia cameroni sp. nov.</i> | <i>Physa gyrina</i>                                                | Canaries*, Ducklings*, Pigeons*                                                                                                                                                                                     | Summer 1949: Outbreak near Montreal in vicinity of Ste. Anne de Bellevue and along the Ottawa River                                                      | Wu, L. (1953) Can. J. Zool. 31:351-373                                                                                                |
|                                          |                                          |                                                                    |                                                                                                                                                                                                                     | Summer 1988: 74 cases from 5 regions - Soit Hull, Portneuf, Lac St-Francois, Rimouski, and Rouyn-Noranda                                                 | Levesque, B. (1990) Can. J. Pub. Health 81(4):329-330                                                                                 |
|                                          | <i>Cercaria ocellata</i> <sup>‡</sup>    | <i>Physa gyrina</i>                                                |                                                                                                                                                                                                                     | Summer 1998: Outbreak at Lac Nairn; Summer 1999: 63 cases from Lac Beauport                                                                              | Levesque, B. et al. (2002) Epi. Infect. 129(2):379-386                                                                                |
| <u>New Brunswick</u>                     | <i>Trichobilharzia stagnicolae</i>       | <i>Lymnaea emarginata</i>                                          |                                                                                                                                                                                                                     | Lake Magaguadavic & Lake Utopia                                                                                                                          | Farley, J. (1967) Can J. Zool. 45(6):1300-1302                                                                                        |
|                                          | <i>Cercaria catascopii n. sp.</i>        | <i>Physa gyrina</i>                                                |                                                                                                                                                                                                                     | Prior to 1976: 3 cases at Lake Magaguadavic, 2 cases at Lake Utopia, & 1 case at Lake Chamcook; all lakes had snails with identified schistosome species | Scott, M.E. & Burt, M.D. (1976) Can. J. Zool. 54:2200-2207                                                                            |
| <u>Nova Scotia</u>                       | <i>Trichobilharzia stagnicolae</i>       | <i>Lymnaea emarginata</i>                                          |                                                                                                                                                                                                                     | Lake Mush-a-Mush & Lake                                                                                                                                  | Farley, J. (1967) Can J. Zool. 45(6):1300-1302                                                                                        |
| <u>Prince Edward Island</u> <sup>§</sup> | <i>Austrotilharzia variglandis</i>       | <i>Nassarius obsoletus</i>                                         |                                                                                                                                                                                                                     | Bay of Fundy                                                                                                                                             | Farley, J. (1967) Can J. Zool. 45(6):1300-1302                                                                                        |

‡ Now *Trichobilharzia stagnicolae*

† Now *Trichobilharzia ocellata*

‡ Now *Trichobilharzia physellae*

§ Now *Austrotilharzia variglandis* or *A. terrigalensis* according to Farley, J. (1971) J. Helminthol. XLV:289-320

§ Noted as derived from personal communication

\* Experimental infections
