# Supplementary material for: Swimmer’s itch in Canada: a look at the past and a survey of the present to plan for the future
Source: PubMed Central journal article supplement (PMC6203143; doi:10.1186/s12940-018-0417-7), 2018-10-25
Supplement: 12940_2018_417_MOESM2_ESM.pdf [file 12940_2018_417_MOESM2_ESM.pdf]

| Question                                                                                               | Response Types or Options                                                                                                                                            |
|--------------------------------------------------------------------------------------------------------|----------------------------------------------------------------------------------------------------------------------------------------------------------------------|
| Name of lake/water body                                                                                | Open Response                                                                                                                                                        |
| Where is the lake/ water body located (city, province, country)?                                       | Open Response                                                                                                                                                        |
| Date you contracted swimmer's itch                                                                     | Open Response                                                                                                                                                        |
| How many people in your party also contracted swimmer's itch on the same day not including yourself? § | Open Response                                                                                                                                                        |
| How would rate the severity of this case of swimmer's itch?                                            | Mild (small rash, some itching)/ Medium (large rash area, very itchy, burning sensation)/Severe (went to doctor/hospital it was so bad)                              |
| To your knowledge, is swimmer's itch a common occurrence at this lake/water body?                      | Yes/No                                                                                                                                                               |
| Do you own property at this lake/water body, or do you visit?                                          | Own property/Visitor                                                                                                                                                 |
| Do you frequently see waterfowl at this lake/water body?                                               | Yes/No                                                                                                                                                               |
| If yes, please list the types if you know them (ducks, geese, etc.)                                    | Open Response                                                                                                                                                        |
| Have you ever seen snails at this lake/water body?                                                     | Yes /No                                                                                                                                                              |
| Describe the water conditions (Temperature, visibility, amount of vegetation, etc.)                    | Yes/No                                                                                                                                                               |
| To your knowledge, was there a Blue-Green Algae warning at this lake the day you visited?              | Yes/No                                                                                                                                                               |
| Do you use this lake/water body less often than you would like because of swimmer's itch               | Yes/No                                                                                                                                                               |
| Do you feel there is adequate information available to you about swimmer's itch?                       | Yes/No/Do not think information is necessary                                                                                                                         |
| If you answered yes, which resources do you consult?                                                   | Open Response                                                                                                                                                        |
| Would you visit lakes and beaches in your area more often if swimmer's itch wasn't a concern?          | Yes/No/The same amount                                                                                                                                               |
| How did you hear about us?                                                                             | Google search/Twitter/Flyer or handout/Information booth/Word of mouth/Community board posting/News from an internet site/News on the radio/News on Television/Other |
| If other, please list where you heard of us?                                                           | Open Response                                                                                                                                                        |
| Open-ended comments                                                                                    | Open Response                                                                                                                                                        |

§ Question added in 2014
