# Supplementary material for: Swimmer’s itch in Canada: a look at the past and a survey of the present to plan for the future
Source: PubMed Central journal article supplement (PMC6203143; doi:10.1186/s12940-018-0417-7), 2018-10-25
Supplement: 12940_2018_417_MOESM3_ESM.pdf [file 12940_2018_417_MOESM3_ESM.pdf]

|                                      | Resid. Df | Resid. Dev | Df  | Deviance | Pr(>Chi)  | logLik   | AIC      | BIC      | dAIC  | df | weight |
|--------------------------------------|-----------|------------|-----|----------|-----------|----------|----------|----------|-------|----|--------|
| <b>Model 1: cases ~ year * month</b> | 0         | -1.49E-14  | NA  | NA       | NA        | -58.0552 | 154.1105 | 172.0548 | 0     | 19 | 1      |
| <b>Model 2: cases ~ month + year</b> | 11        | 359.2      | -11 | -359.24  | < 2.2e-16 | -237.676 | 491.3527 | 498.9082 | 337.2 | 8  | <0.001 |
| <b>Model 3: cases ~ year</b>         | 15        | 3335       | -4  | -2975.77 | < 2.2e-16 | -1725.56 | 3459.125 | 3462.903 | 3305  | 4  | <0.001 |
| <b>Model 4: cases ~ month</b>        | 14        | 686.3      | 1   | 2648.69  | < 2.2e-16 | -401.217 | 812.434  | 817.1562 | 658.3 | 5  | <0.001 |
