# Supplementary material for: Swimmer’s itch in Canada: a look at the past and a survey of the present to plan for the future
Source: PubMed Central journal article supplement (PMC6203143; doi:10.1186/s12940-018-0417-7), 2018-10-25
Supplement: 12940_2018_417_MOESM4_ESM.pdf [file 12940_2018_417_MOESM4_ESM.pdf]

| Species group (w/in group divergence range) | A. vari. | Avian sp.A   | Avian sp.B | Avian sp.C | T. anseri    | T. brantae   | T. franki    | T. mergi     | T. phys.     | T. quer.     | T. regenti   | T. sp. A     | T. sp. B | T. sp. C     | T. sp. D     | T. sp. E     | T. stag.     | T. szidati   | W1285 | W2081 |
|---------------------------------------------|----------|--------------|------------|------------|--------------|--------------|--------------|--------------|--------------|--------------|--------------|--------------|----------|--------------|--------------|--------------|--------------|--------------|-------|-------|
| <i>A. variglandis</i>                       | -        | 0.018        | 0.019      | 0.019      | 0.018        | 0.019        | 0.019        | 0.019        | 0.018        | 0.019        | 0.017        | 0.018        | 0.018    | 0.019        | 0.018        | 0.018        | 0.018        | 0.018        | 0.019 | 0.019 |
| <i>Avian sp. A</i> (0.0-3.6%)               | 0.187    | <b>0.011</b> | 0.016      | 0.018      | 0.017        | 0.018        | 0.018        | 0.017        | 0.017        | 0.016        | 0.017        | 0.018        | 0.018    | 0.017        | 0.018        | 0.017        | 0.017        | 0.017        | 0.019 | 0.017 |
| <i>Avian sp. B</i>                          | 0.206    | 0.141        | -          | 0.018      | 0.018        | 0.018        | 0.017        | 0.017        | 0.017        | 0.017        | 0.017        | 0.017        | 0.017    | 0.016        | 0.017        | 0.018        | 0.017        | 0.016        | 0.018 | 0.018 |
| <i>Avian sp. C</i>                          | 0.204    | 0.181        | 0.185      | -          | 0.017        | 0.019        | 0.018        | 0.017        | 0.017        | 0.018        | 0.017        | 0.018        | 0.018    | 0.018        | 0.017        | 0.017        | 0.016        | 0.017        | 0.018 | 0.019 |
| <i>T. anseri</i> (0.0-0.7%)                 | 0.181    | 0.166        | 0.184      | 0.157      | <b>0.002</b> | 0.017        | 0.014        | 0.015        | 0.014        | 0.015        | 0.014        | 0.014        | 0.015    | 0.014        | 0.014        | 0.014        | 0.015        | 0.014        | 0.017 | 0.018 |
| <i>T. brantae</i> (0.0%)                    | 0.187    | 0.180        | 0.187      | 0.187      | 0.146        | <b>0.000</b> | 0.016        | 0.017        | 0.016        | 0.016        | 0.015        | 0.016        | 0.016    | 0.016        | 0.016        | 0.017        | 0.016        | 0.015        | 0.017 | 0.018 |
| <i>T. franki</i> (0.0-1.7%)                 | 0.197    | 0.169        | 0.171      | 0.175      | 0.116        | 0.141        | <b>0.006</b> | 0.015        | 0.012        | 0.012        | 0.014        | 0.013        | 0.012    | 0.012        | 0.015        | 0.015        | 0.015        | 0.014        | 0.017 | 0.017 |
| <i>T. mergi</i> (0.0-0.7%)                  | 0.182    | 0.175        | 0.176      | 0.150      | 0.112        | 0.153        | 0.115        | <b>0.004</b> | 0.015        | 0.014        | 0.012        | 0.016        | 0.014    | 0.015        | 0.014        | 0.015        | 0.015        | 0.013        | 0.017 | 0.017 |
| <i>T. physellae</i> (0.0-1.0%)              | 0.185    | 0.175        | 0.163      | 0.160      | 0.116        | 0.141        | 0.074        | 0.119        | <b>0.004</b> | 0.012        | 0.014        | 0.013        | 0.012    | 0.013        | 0.015        | 0.016        | 0.015        | 0.014        | 0.018 | 0.017 |
| <i>T. querquedulae</i> (0.2-2.6%)           | 0.206    | 0.158        | 0.171      | 0.171      | 0.125        | 0.133        | 0.072        | 0.110        | <b>0.081</b> | <b>0.011</b> | 0.014        | 0.013        | 0.012    | 0.012        | 0.014        | 0.015        | 0.015        | 0.013        | 0.016 | 0.017 |
| <i>T. regenti</i> (0.0-3.6%)                | 0.185    | 0.175        | 0.175      | 0.154      | 0.119        | 0.120        | 0.110        | 0.089        | 0.106        | 0.109        | <b>0.017</b> | 0.014        | 0.013    | 0.014        | 0.014        | 0.013        | 0.014        | 0.013        | 0.015 | 0.017 |
| <i>T. sp. A</i> (0.2-1.4%)                  | 0.195    | 0.166        | 0.169      | 0.173      | 0.124        | 0.131        | 0.083        | 0.125        | 0.095        | 0.081        | 0.100        | <b>0.010</b> | 0.011    | 0.013        | 0.014        | 0.015        | 0.015        | 0.013        | 0.017 | 0.017 |
| <i>T. sp. B</i>                             | 0.187    | 0.173        | 0.175      | 0.165      | 0.129        | 0.141        | 0.071        | 0.104        | 0.078        | 0.068        | 0.086        | 0.058        | -        | 0.012        | 0.014        | 0.015        | 0.015        | 0.013        | 0.016 | 0.016 |
| <i>T. sp. C</i> (1.2%)                      | 0.198    | 0.182        | 0.173      | 0.187      | 0.127        | 0.129        | 0.084        | 0.127        | 0.086        | 0.088        | 0.102        | 0.091        | 0.079    | <b>0.012</b> | 0.015        | 0.016        | 0.015        | 0.014        | 0.016 | 0.017 |
| <i>T. sp. D</i> (0.0%)                      | 0.177    | 0.186        | 0.165      | 0.149      | 0.120        | 0.127        | 0.114        | 0.098        | 0.119        | 0.111        | 0.103        | 0.107        | 0.103    | 0.120        | <b>0.000</b> | 0.014        | 0.014        | 0.013        | 0.017 | 0.017 |
| <i>T. sp. E</i> (0.0-0.5%)                  | 0.171    | 0.167        | 0.177      | 0.153      | 0.103        | 0.149        | 0.119        | 0.112        | 0.125        | 0.124        | 0.102        | 0.125        | 0.122    | 0.132        | 0.092        | <b>0.003</b> | 0.014        | 0.013        | 0.016 | 0.018 |
| <i>T. stagnicolae</i> (0.0-5.5%)*           | 0.175    | 0.162        | 0.162      | 0.153      | 0.125        | 0.140        | 0.127        | 0.124        | 0.135        | 0.121        | 0.114        | 0.121        | 0.125    | 0.126        | 0.109        | 0.104        | <b>0.013</b> | 0.014        | 0.017 | 0.017 |
| <i>T. szidati</i> (0.5-4.8%)                | 0.194    | 0.158        | 0.158      | 0.156      | 0.106        | 0.123        | 0.111        | 0.102        | 0.112        | 0.103        | 0.109        | 0.103        | 0.102    | 0.120        | 0.100        | 0.100        | 0.118        | <b>0.030</b> | 0.016 | 0.017 |
| W1285                                       | 0.194    | 0.195        | 0.189      | 0.177      | 0.155        | 0.161        | 0.157        | 0.147        | 0.157        | 0.143        | 0.118        | 0.149        | 0.132    | 0.155        | 0.146        | 0.140        | 0.155        | 0.156        | -     | 0.017 |
| W2081                                       | 0.218    | 0.152        | 0.170      | 0.175      | 0.182        | 0.173        | 0.157        | 0.169        | 0.169        | 0.158        | 0.165        | 0.152        | 0.141    | 0.167        | 0.161        | 0.173        | 0.144        | 0.153        | 0.168 | -     |

\* excluding FJ174493, range is 0.0-1.4%
