# Supplementary material for: Swimmer’s itch in Canada: a look at the past and a survey of the present to plan for the future
Source: PubMed Central journal article supplement (PMC6203143; doi:10.1186/s12940-018-0417-7), 2018-10-25

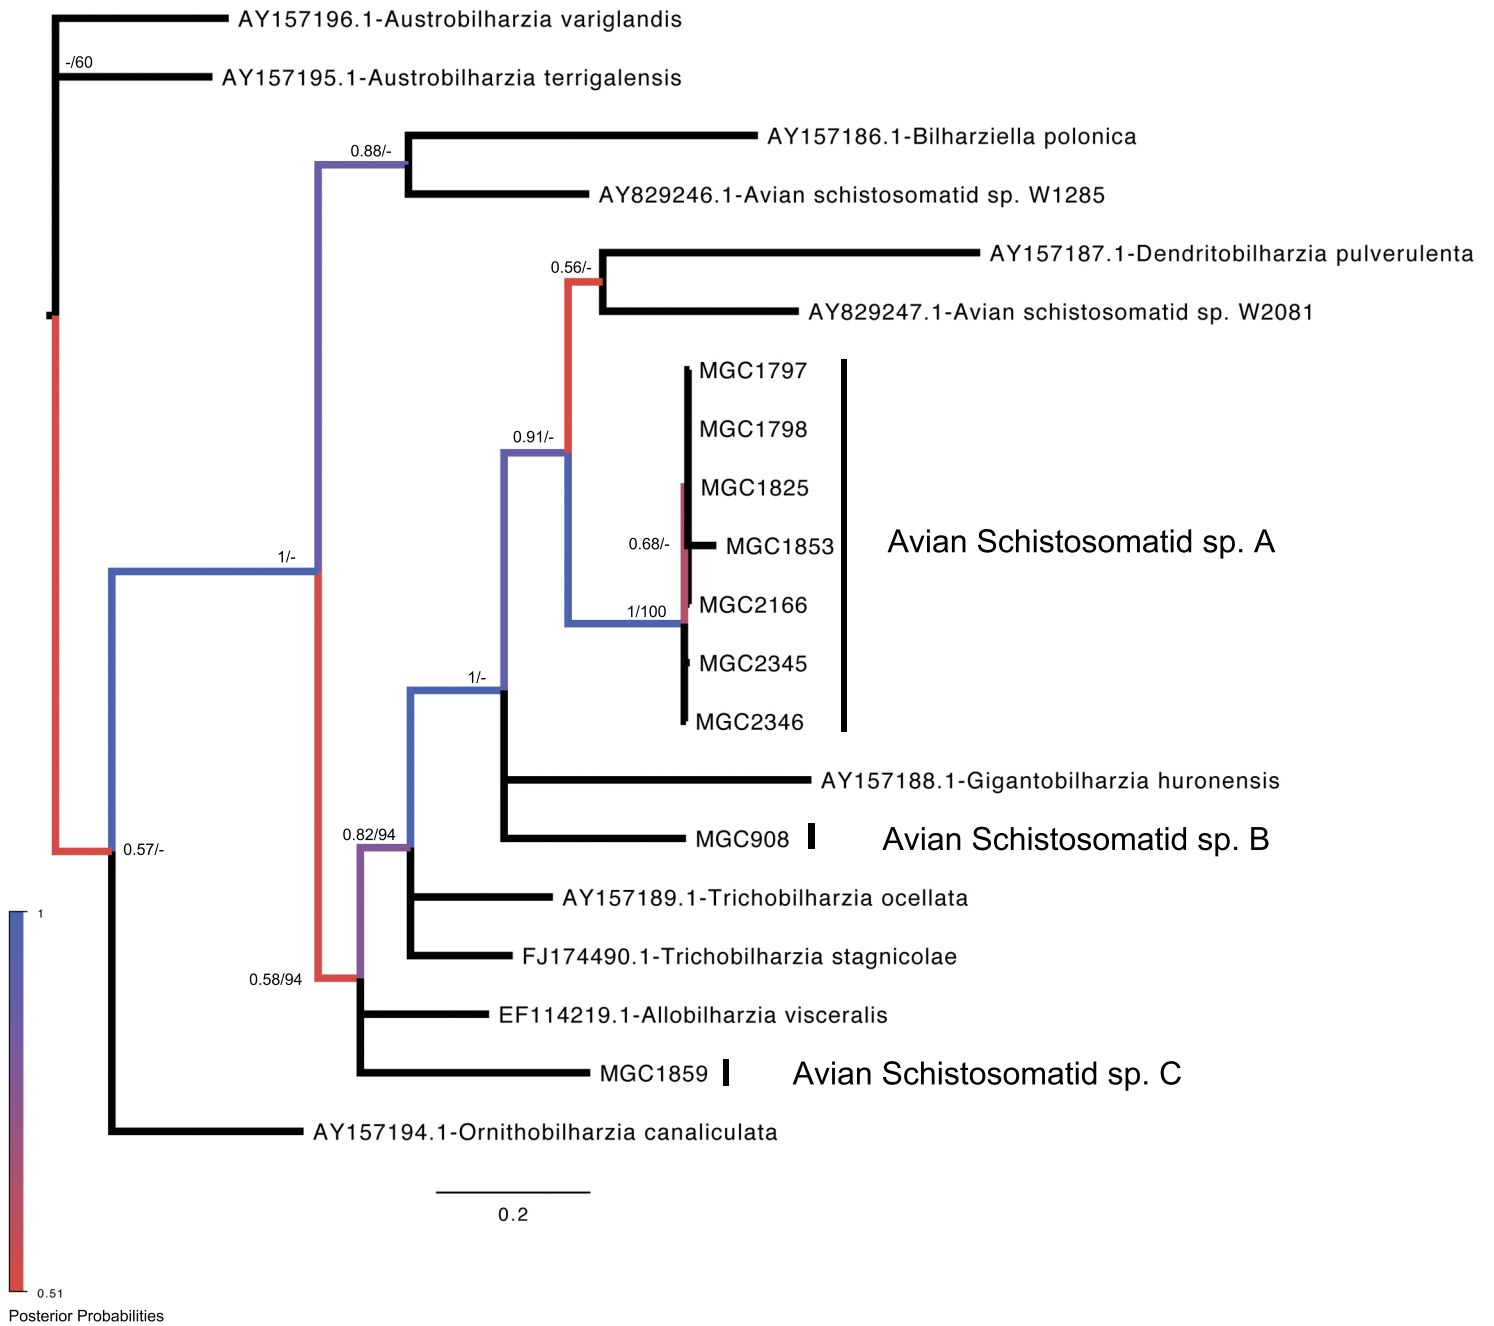

Supplement: 12940_2018_417_MOESM5_ESM.pdf [file 12940_2018_417_MOESM5_ESM.pdf]
