# Supplementary material for: Swimmer’s itch in Canada: a look at the past and a survey of the present to plan for the future
Source: PubMed Central journal article supplement (PMC6203143; doi:10.1186/s12940-018-0417-7), 2018-10-25
Supplement: 12940_2018_417_MOESM15_ESM.pdf [file 12940_2018_417_MOESM15_ESM.pdf]

| <b>Province</b> | <b>Lake</b>                         | <b>Cases</b> | <b>Years Reported</b>        |
|-----------------|-------------------------------------|--------------|------------------------------|
| <u>Alberta</u>  | Athabasca River at Whispering Hills | 2            | 2015                         |
|                 | Baptiste Lake                       | 1            | 2016                         |
|                 | Barrier Lake                        | 1            | 2016                         |
|                 | Battle Lake                         | 1            | 2015                         |
|                 | Bear Lake                           | 8            | 2014                         |
|                 | Bear Trap Lake                      | 13           | 2015                         |
|                 | Bearhills Lake                      | 1            | 2013                         |
|                 | Bellis Beach Lake                   | 1            | 2013                         |
|                 | Buck Lake                           | 14           | 2015, 2016, 2017             |
|                 | Buffalo Lake                        | 423          | 2013, 2014, 2015, 2016, 2017 |
|                 | Burnstick Lake                      | 1            | 2013                         |
|                 | Calling Lake                        | 2            | 2013, 2017                   |
|                 | Cameron Lake                        | 29           | 2015, 2017                   |
|                 | Capt. Ayr Lake                      | 1            | 2013                         |
|                 | Chestermere Lake                    | 5            | 2014, 2015                   |
|                 | Chickenhill Lake                    | 7            | 2016, 2017                   |
|                 | Chump Lake                          | 10           | 2013, 2015, 2016             |
|                 | Cold Lake                           | 55           | 2013, 2014, 2015, 2016       |
|                 | Cornwall Lake                       | 1            | 2013                         |
|                 | Cow Lake                            | 2            | 2013                         |
|                 | Crimson Lake                        | 2            | 2013                         |
|                 | Dilberry Lake                       | 18           | 2015, 2017                   |
|                 | Edith Lake                          | 15           | 2015, 2017                   |
|                 | Elkwater Lake                       | 2            | 2016                         |
|                 | Fickle Lake                         | 9            | 2015, 2016                   |
|                 | Floatingstone Lake                  | 72           | 2013, 2015, 2016, 2017       |
|                 | Fork Lake                           | 5            | 2013, 2015                   |
|                 | Fox Creek Trout Pond                | 12           | 2014                         |
|                 | Garner Lake                         | 39           | 2015, 2016                   |
|                 | Gerharts Lake                       | 4            | 2015                         |
|                 | Ghost Lake                          | 1            | 2014                         |
|                 | Granum Pond                         | 1            | 2013                         |
|                 | Gregoire Lake                       | 3            | 2013, 2015                   |
|                 | Gull Lake                           | 15           | 2014, 2016, 2017             |
|                 | Half Moon Lake                      | 39           | 2013, 2014, 2015, 2016, 2017 |
|                 | Hanmore Lake                        | 69           | 2013, 2014, 2015, 2016       |
|                 | Hasse Lake                          | 1            | 2017                         |
|                 | Hermitage Pond                      | 1            | 2013                         |
|                 | Hope Lake                           | 33           | 2013, 2014, 2015, 2017       |
|                 | Hubbles Lake                        | 58           | 2013, 2015, 2016, 2017       |
|                 | Island Lake                         | 15           | 2015, 2016, 2017             |
|                 | Jackfish Lake                       | 49           | 2013, 2015, 2016, 2017       |
|                 | Jarvis Lake                         | 2            | 2014                         |
|                 | Kirk Lake                           | 1            | 2017                         |
|                 | Lac Bellevue                        | 24           | 2014, 2015                   |
|                 | Lac La Biche                        | 14           | 2013, 2014, 2015, 2016       |

|                                   |    |                              |
|-----------------------------------|----|------------------------------|
| Lac la Nonne                      | 1  | 2014                         |
| Lac Sante                         | 45 | 2015, 2016, 2017             |
| Lac St Cyr                        | 4  | 2015                         |
| Lac Ste. Anne                     | 14 | 2013, 2014, 2015, 2016       |
| Lake Annette                      | 1  | 2013                         |
| Lake Bonavista                    | 16 | 2014, 2015                   |
| Lake Isle                         | 4  | 2013, 2015                   |
| Lake Newell                       | 1  | 2017                         |
| Laurier Lake                      | 9  | 2013, 2015                   |
| Lessard Lake                      | 4  | 2013                         |
| Lesser Slave Lake                 | 11 | 2013, 2014, 2015, 2017       |
| Little Bow Lake                   | 4  | 2014, 2015                   |
| Long Island Lake                  | 1  | 2013                         |
| Long Lake                         | 62 | 2013, 2014, 2015, 2016, 2017 |
| Lower Therien Lake                | 2  | 2014                         |
| Marie Lake                        | 4  | 2013, 2014                   |
| McKenzie Lake                     | 8  | 2015                         |
| Millers Lake                      | 3  | 2017                         |
| Mink Lake                         | 3  | 2015                         |
| Miquelon Lake                     | 11 | 2015, 2016                   |
| Mons Lake                         | 3  | 2015, 2017                   |
| Moose Lake                        | 19 | 2013, 2014, 2015             |
| Nakamun Lake                      | 16 | 2013, 2015, 2016             |
| North Buck Lake                   | 61 | 2013, 2014, 2015, 2016, 2017 |
| Open Creek Dam                    | 2  | 2016                         |
| Park Lake                         | 7  | 2015, 2017                   |
| Pigeon Lake                       | 90 | 2013, 2014, 2015, 2016, 2017 |
| Pine Lake                         | 7  | 2017                         |
| Rattlesnake Lake                  | 3  | 2013, 2017                   |
| Red Deer River                    | 2  | 2015                         |
| Reesor Lake                       | 4  | 2015                         |
| Rock Lake                         | 1  | 2017                         |
| Ross Lake                         | 16 | 2013, 2014, 2017             |
| Rundle Park                       | 1  | 2015                         |
| Saskatoon Lake                    | 1  | 2013                         |
| Shorncliffe Lake                  | 15 | 2013, 2015                   |
| Skeleton Lake                     | 8  | 2016, 2017                   |
| Spring Lake                       | 28 | 2013, 2014, 2015, 2016, 2017 |
| Spruce Coulee Reservoir           | 1  | 2017                         |
| St Mary Reservoir                 | 1  | 2015                         |
| Sundance Lake                     | 1  | 2013                         |
| Sylvan Lake                       | 25 | 2013, 2015, 2016, 2017       |
| Three Mile Bend at Red Deer River | 5  | 2016                         |
| Thunder Lake                      | 8  | 2013, 2015                   |
| Touchwood Lake                    | 4  | 2014                         |
| Travers Reservoir                 | 2  | 2013, 2015                   |
| Trestle Creek Golf Resort         | 31 | 2015, 2016                   |

|                         |                                  |     |                              |
|-------------------------|----------------------------------|-----|------------------------------|
|                         | Twin Lake                        | 44  | 2016, 2017                   |
|                         | Wabamun Lake                     | 201 | 2013, 2014, 2015, 2016, 2017 |
|                         | Wasa Lake                        | 1   | 2015                         |
|                         | Wedge Pond                       | 2   | 2017                         |
|                         | Whitefish Lake                   | 4   | 2013, 2016                   |
|                         | Whitney Lake                     | 26  | 2013, 2014, 2015, 2016, 2017 |
|                         | Wizard Lake                      | 3   | 2015, 2016                   |
|                         | Wolf Lake                        | 10  | 2013, 2015                   |
| <u>British Columbia</u> | Adams Lake                       | 24  | 2013, 2014, 2016, 2017       |
|                         | Alta Lake                        | 27  | 2013, 2014, 2015, 2017       |
|                         | Arrow Lake Park                  | 1   | 2013                         |
|                         | Arrow Lakes                      | 1   | 2013                         |
|                         | Babine Lake                      | 2   | 2013, 2016                   |
|                         | Bear Lake                        | 3   | 2013, 2017                   |
|                         | Buttle Lake                      | 12  | 2013, 2014, 2016, 2017       |
|                         | Centennial Beach at Boundary Bay | 1   | 2017                         |
|                         | Charlie Lake                     | 3   | 2013                         |
|                         | Chehalis Lake                    | 4   | 2015                         |
|                         | Chilliwack Lake                  | 3   | 2013, 2016                   |
|                         | Columbia River                   | 1   | 2013                         |
|                         | Comox Lake                       | 10  | 2013, 2014, 2016, 2017       |
|                         | Cowichan Lake                    | 5   | 2015                         |
|                         | Crescent Beach                   | 45  | 2013, 2014, 2015, 2016, 2017 |
|                         | Cultus Lake                      | 132 | 2013, 2014, 2015, 2016, 2017 |
|                         | Cusheon Lake                     | 5   | 2015                         |
|                         | Dunn Lake                        | 7   | 2014                         |
|                         | Echo Lake                        | 2   | 2015                         |
|                         | Enid Lake                        | 1   | 2013                         |
|                         | Fishblue Lake                    | 6   | 2016, 2017                   |
|                         | Francois Lake                    | 2   | 2014                         |
|                         | Harrison Lake                    | 29  | 2015, 2016, 2017             |
|                         | Horne Lake                       | 85  | 2013, 2014, 2015, 2016, 2017 |
|                         | Inzana Lake                      | 6   | 2017                         |
|                         | Kalamalka Lake                   | 18  | 2013, 2014, 2015, 2016       |
|                         | Kennedy Lake                     | 3   | 2015                         |
|                         | Kin Beach                        | 1   | 2013                         |
|                         | Kokanee Lake                     | 1   | 2013                         |
|                         | Kootenay Lake                    | 20  | 2013, 2014, 2017             |
|                         | Langford Lake                    | 4   | 2017                         |
|                         | Lac La Hache                     | 12  | 2013, 2016, 2017             |
|                         | Lake Pinantan                    | 6   | 2015, 2017                   |
|                         | Lake Windermere                  | 29  | 2013, 2014, 2016, 2017       |
|                         | Little Shuswap Lake              | 17  | 2013, 2014, 2015             |
|                         | Long Lake                        | 1   | 2015                         |
|                         | Loon Lake                        | 1   | 2014                         |
|                         | Lost Lake                        | 1   | 2013                         |
|                         | Lost Lake (Whistler)             | 3   | 2017                         |

|                              |                               |     |                              |
|------------------------------|-------------------------------|-----|------------------------------|
|                              | Mabel Lake                    | 33  | 2013, 2014, 2015, 2016, 2017 |
|                              | Madden Lake                   | 1   | 2013                         |
|                              | Maiden Lake                   | 4   | 2014                         |
|                              | Mara Lake                     | 10  | 2013, 2016                   |
|                              | Monte Lake                    | 2   | 2013, 2016                   |
|                              | Nadsilnich Lake               | 1   | 2017                         |
|                              | Nanaimo Lakes #2              | 1   | 2013                         |
|                              | Nicola Lake                   | 4   | 2015                         |
|                              | Nukko Lake                    | 2   | 2016                         |
|                              | Okanagan Lake                 | 57  | 2013, 2014, 2015, 2016, 2017 |
|                              | Osoyoos Lake                  | 3   | 2013, 2015                   |
|                              | Pacific Ocean near White Rock | 7   | 2013, 2014, 2016             |
|                              | Paul Lake                     | 20  | 2014, 2015, 2017             |
|                              | Peckhams Lake                 | 2   | 2015                         |
|                              | Premier Lake                  | 1   | 2013                         |
|                              | Rolley Lake                   | 7   | 2017                         |
|                              | Sasamat Lake                  | 3   | 2013, 2016, 2017             |
|                              | Shuswap Lake                  | 281 | 2013, 2014, 2015, 2016, 2017 |
|                              | Shuswap River                 | 1   | 2014                         |
|                              | Spider Lake                   | 3   | 2015                         |
|                              | Stuart Lake                   | 1   | 2013                         |
|                              | Surveyors Lake                | 8   | 2013                         |
|                              | Thetis Lake                   | 1   | 2017                         |
|                              | Tie Lake                      | 2   | 2017                         |
|                              | Trout Lake                    | 6   | 2014, 2015                   |
|                              | Wasa Lake                     | 65  | 2013, 2014, 2015, 2016, 2017 |
|                              | Weston Lake                   | 4   | 2015                         |
|                              | Wood Lake                     | 6   | 2015, 2017                   |
|                              | Woss Lake                     | 2   | 2014                         |
| <u>Manitoba</u>              | Clear Lake                    | 23  | 2013, 2015, 2016             |
|                              | Dorothy Lake                  | 3   | 2017                         |
|                              | Kenton Reservoir              | 4   | 2015                         |
|                              | Lake Winnipeg                 | 1   | 2017                         |
|                              | West Hawk Lake                | 1   | 2017                         |
|                              | Wild Oaks Campground Beach    | 21  | 2017                         |
| <u>New Brunswick</u>         | Fisher Lakes                  | 4   | 2015                         |
|                              | St John River                 | 9   | 2014, 2015                   |
| <u>Newfoundland</u>          | Northwest Pond                | 6   | 2013                         |
| <u>Northwest Territories</u> | Great Slave Lake              | 1   | 2013                         |
| <u>Nova Scotia</u>           | Grand Lake                    | 1   | 2013                         |
|                              | Lake Ainslie                  | 4   | 2015                         |
|                              | Lake Banook                   | 1   | 2015                         |
|                              | Mattatall Lake                | 1   | 2015                         |
| <u>Ontario</u>               | Adams Lake                    | 1   | 2016                         |
|                              | Balsam Lake                   | 1   | 2017                         |
|                              | Baptiste Lake                 | 1   | 2015                         |
|                              | Bass Lake                     | 22  | 2013, 2015, 2016             |

|                                          |    |                              |
|------------------------------------------|----|------------------------------|
| Bass Lake near Lombardy                  | 1  | 2013                         |
| Baxter Lake                              | 3  | 2015                         |
| Bear Lake                                | 3  | 2016                         |
| Berford Lake                             | 1  | 2013                         |
| Big Rideau Lake                          | 3  | 2016                         |
| Black River                              | 2  | 2016                         |
| Bobs Lake                                | 1  | 2013                         |
| Bon Echo Provincial Park at Mazinaw Lake | 2  | 2016                         |
| Boshkung Lake                            | 5  | 2016, 2017                   |
| Cameron Lake                             | 3  | 2016                         |
| Centennial Lake                          | 1  | 2013                         |
| Chesley Lake                             | 2  | 2015                         |
| Commando Lake                            | 3  | 2015                         |
| Cranberry Lake                           | 1  | 2015                         |
| Crotch Lake                              | 4  | 2015                         |
| Elliot Lake                              | 1  | 2014                         |
| Farlain Lake                             | 4  | 2017                         |
| Fitzroy Provincial Park                  | 1  | 2013                         |
| Golden Lake                              | 30 | 2013, 2015, 2016, 2017       |
| Guelph Lake                              | 1  | 2015                         |
| Gull Lake                                | 5  | 2015                         |
| Gullivers Lake                           | 9  | 2016                         |
| Harmony Beach at Lake Superior           | 2  | 2016                         |
| Havilland Bay at Lake Superior           | 3  | 2016                         |
| Horseshoe Lake                           | 3  | 2014, 2016                   |
| Jack Lake                                | 11 | 2013, 2014, 2017             |
| Kashagawigamog Lake                      | 1  | 2013                         |
| Kawawaymog Lake                          | 1  | 2015                         |
| Kennisis Lake                            | 1  | 2013                         |
| Koshlong Lake                            | 1  | 2015                         |
| Lake Clear                               | 14 | 2015, 2016                   |
| Lake Couchiching                         | 2  | 2015                         |
| Lake Erie                                | 15 | 2013, 2015, 2017             |
| Lake Huron at Southampton                | 2  | 2015                         |
| Lake Huron Georgian Bay                  | 21 | 2014, 2015, 2016, 2017       |
| Lake Huron Sauble Beach                  | 3  | 2013, 2017                   |
| Lake Kamaniskeg                          | 11 | 2013                         |
| Lake Louisa                              | 2  | 2016                         |
| Lake Manitou                             | 1  | 2013                         |
| Lake Muskoka                             | 5  | 2015                         |
| Lake Nipissing                           | 30 | 2013, 2014, 2015, 2016, 2017 |
| Lake Nosbonsing                          | 6  | 2017                         |
| Lake Ontario                             | 5  | 2013, 2016, 2017             |
| Lake Rosseau                             | 1  | 2014                         |
| Lake Temagami                            | 2  | 2016                         |
| Lake Wilcox                              | 1  | 2017                         |
| Lake Wolsey                              | 2  | 2015                         |

|                                                  |    |                        |
|--------------------------------------------------|----|------------------------|
| Limerick Lake                                    | 2  | 2015                   |
| Little Cranberry Lake                            | 3  | 2015                   |
| Marl Lake                                        | 3  | 2015                   |
| Mazinaw Lake                                     | 16 | 2013, 2015, 2016       |
| Mink Lake                                        | 3  | 2016                   |
| Missinaibi Lake                                  | 3  | 2017                   |
| Mississippi River                                | 11 | 2016                   |
| Moon River at Georgian Bay                       | 1  | 2016                   |
| Mooneys Bay                                      | 1  | 2013                   |
| Musselman Lake                                   | 4  | 2017                   |
| Napanee River (Camden East)                      | 2  | 2017                   |
| Orr Lake                                         | 9  | 2015, 2016             |
| Ottawa River at Harvey Creek                     | 4  | 2015                   |
| Ottawa River at Haydon Park                      | 1  | 2015                   |
| Ottawa River Pembroke                            | 2  | 2015                   |
| Peninsula Lake                                   | 2  | 2016                   |
| Pigeon Lake                                      | 1  | 2013                   |
| Red Cedar Lake                                   | 3  | 2015                   |
| Regina Bay at Glouster Pool at Georgian Bay      | 3  | 2016                   |
| Remi Lake                                        | 4  | 2014, 2015             |
| Rice Lake                                        | 2  | 2013                   |
| Riley Lake                                       | 3  | 2015                   |
| Round Lake                                       | 2  | 2017                   |
| Sandbar Lake                                     | 2  | 2017                   |
| Shabomeka Lake                                   | 8  | 2015, 2016             |
| Simcoe Lake                                      | 15 | 2013, 2015, 2016       |
| Six Mile Lake                                    | 3  | 2016                   |
| Spencer Creek                                    | 1  | 2013                   |
| St Marys River                                   | 1  | 2013                   |
| Stoney Lake                                      | 1  | 2017                   |
| Sturgeon Bay Provincial Park at Georgian Bay     | 2  | 2016                   |
| Tait Lake                                        | 1  | 2016                   |
| Thunder Bay at Lake Superior                     | 17 | 2016                   |
| Trout Lake                                       | 30 | 2013, 2014, 2015, 2016 |
| Upper Canada Campground Pond                     | 10 | 2014                   |
| Valens Lake                                      | 5  | 2016                   |
| Wasaga Beach Georgian Bay                        | 2  | 2015                   |
| White Lake                                       | 4  | 2014, 2015             |
| Wild Goose Beach Lake Superior                   | 3  | 2015                   |
| Wollaston Lake                                   | 1  | 2016                   |
| <u>Quebec</u> Grand Lac MacDonald/Lake MacDonald | 5  | 2013, 2016             |
| Lac Cameron                                      | 1  | 2013                   |
| Lac des Seize Iles                               | 1  | 2013                   |
| Lac Massawippi                                   | 1  | 2016                   |
| Lac Meech                                        | 2  | 2016                   |
| Lac Opasatica                                    | 1  | 2013                   |
| Lac Phillipe                                     | 5  | 2013, 2016             |

|                     |                             |              |                              |
|---------------------|-----------------------------|--------------|------------------------------|
| <u>Saskatchewan</u> | Riviere des Outaouais       | 3            | 2014                         |
|                     | Blackstrap Lake             | 3            | 2015                         |
|                     | Buffalo Pound Lake          | 6            | 2013, 2015                   |
|                     | Candle Lake                 | 3            | 2015                         |
|                     | Chitek Lake                 | 18           | 2017                         |
|                     | Delaronde Lake              | 1            | 2015                         |
|                     | Greenwater Lake             | 2            | 2013                         |
|                     | Greig Lake                  | 54           | 2013, 2014, 2015, 2016, 2017 |
|                     | Jackfish Lake               | 22           | 2016                         |
|                     | Jeannette Lake              | 1            | 2013                         |
|                     | Jumbo Lake                  | 1            | 2013                         |
|                     | Kimball Lake                | 36           | 2014, 2015, 2016, 2017       |
|                     | Lac des Iles                | 5            | 2013, 2017                   |
|                     | Lac La Ronge                | 1            | 2013                         |
|                     | Last Mountain Lake          | 2            | 2017                         |
|                     | Lower Fishing Lake          | 3            | 2013                         |
|                     | Madge Lake                  | 8            | 2013, 2015                   |
|                     | Makwa Lake                  | 1            | 2013                         |
|                     | Marean Lake                 | 2            | 2013                         |
|                     | Martins Lake                | 51           | 2017                         |
|                     | Matheson Lake               | 16           | 2015, 2016                   |
|                     | Meeting Lake                | 1            | 2013                         |
|                     | Memorial Lake               | 7            | 2013, 2016, 2017             |
|                     | Murray Lake                 | 1            | 2017                         |
|                     | Pierce Lake                 | 28           | 2013, 2015, 2016             |
|                     | Shell Lake                  | 3            | 2013, 2014                   |
|                     | Suffern Lake                | 16           | 2013, 2014, 2017             |
|                     | Turtle Lake                 | 10           | 2014, 2017                   |
|                     | Wakaw Lake                  | 6            | 2013, 2015                   |
|                     | Waskesiu Lake               | 3            | 2016, 2017                   |
|                     | <u>United States</u>        | Detroit Lake | 1                            |
|                     | Frenchman Lake              | 3            | 2016                         |
|                     | Higgins Lake                | 1            | 2013                         |
|                     | Lake McDonald               | 2            | 2013                         |
|                     | Osoyoos Lake                | 2            | 2015                         |
|                     | San Diego River Mission Bay | 1            | 2015                         |
|                     | Silverwood Lake             | 3            | 2015                         |
|                     | Osoyoos Lake                | 2            | 2017                         |
|                     | Big Creek Lake              | 2            | 2017                         |
|                     | Truckee River               | 1            | 2017                         |

---
